# Supplementary material for: The PTEN/Akt Pathway Dictates the Direct αVβ3-Dependent Growth-Inhibitory Action of an Active Fragment of Tumstatin in Glioma Cells In vitro and In vivo
Source: Oxford University Press journal article supplement (doi:10.1158/0008-5472.can-06-1540), 2006-12-01
Supplement: 00085472can061540-sup-supplementary_figure_2.pdf [file 00085472can061540-sup-supplementary_figure_2.pdf]

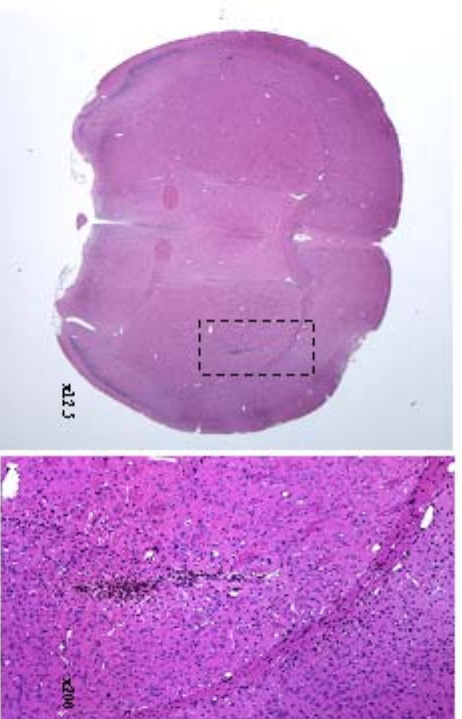

*Supplemental Figure 2* - Lack of localized toxicity following intracranially-delivered T3 peptide (left panel). T3 peptide was infused twice (at day 0 and day 4) into intact mouse brain by CED. 4 days after the second infusion the brains were removed, fixed, sectioned, and stained with H&E. Magnifications of a whole brain section (x12.5, left) and of the boxed injection area in the left panel (x100, right) are shown.
