# Supplementary material for: The PTEN/Akt Pathway Dictates the Direct αVβ3-Dependent Growth-Inhibitory Action of an Active Fragment of Tumstatin in Glioma Cells In vitro and In vivo
Source: Oxford University Press journal article supplement (doi:10.1158/0008-5472.can-06-1540), 2006-12-01
Supplement: 00085472can061540-sup-supplementary_figure_3.pdf [file 00085472can061540-sup-supplementary_figure_3.pdf]

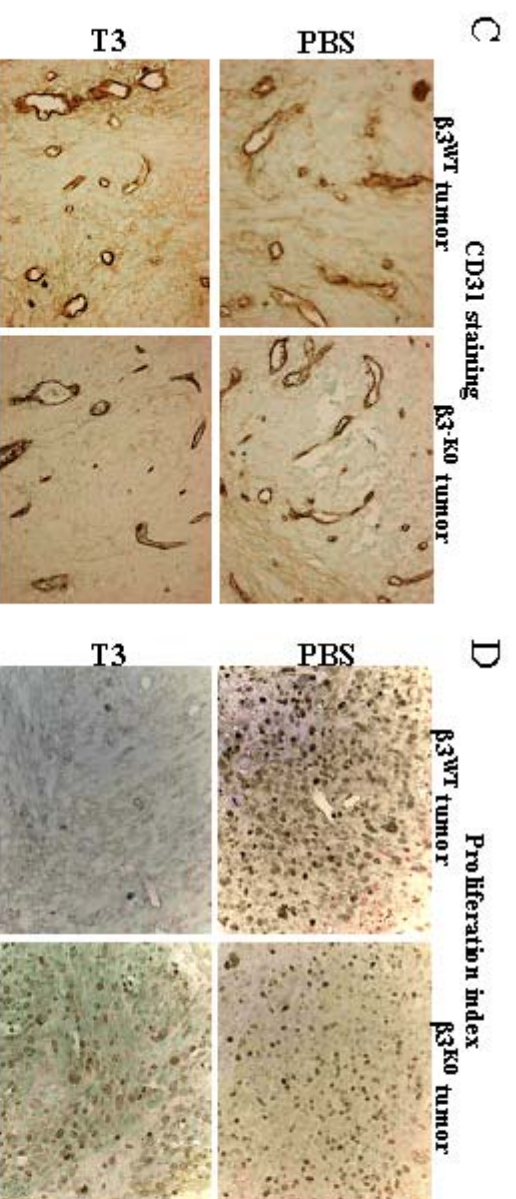

*Supplemental Figure 3 - C, Analysis of the effects of CED-delivered T3 on tumor vessels.*

Tumors derived as in Fig 6B were sectioned and subjected to immunohistochemical analysis of vessel area following staining of endothelial cells with an antibody specific for CD31. Vessel area was measured by using Openlab software in high power (x400) fields (top panels) of control (PBS) or T3-treated tumor. *D*, Analysis of the effects of CED-delivered T3 on tumor proliferative index. Tumors derived as in 6B were sectioned and subjected to immunohistochemical analysis using a Ki67 antibody whose staining is indicative of proliferation. Proliferation index was calculated by dividing the number of Ki67-positive nuclei by the number of total nuclei in 20 individual high power (x400) fields per control (PBS) or T3-treated tumor.
